# Supplementary material for: Highly crosslinked, chlorine tolerant polymer network entwined graphene oxide membrane for water desalination
Source: Royal Society of Chemistry journal article supplement (doi:10.1039/c6ta07350f), 2016-12-22
Supplement: c6ta07350f1.pdf [file c6ta07350f1.pdf]

ARTICLE

## Highly crosslinked, chlorine-tolerant polymer network entwined graphene oxide membrane for water desalination

Received 00th January 20xx,  
Accepted 00th January 20xx

Seungju Kim<sup>a</sup>, Xiaocheng Lin<sup>a</sup>, Ranwen Ou<sup>a</sup>, Huiyuan Liu<sup>a</sup>, Xiwang Zhang<sup>a</sup>, George P. Simon<sup>b</sup>,  
Christopher D. Easton<sup>c</sup>, and Huanting Wang<sup>\*a</sup>

DOI: 10.1039/x0xx00000x

www.rsc.org/

### Supplementary Information

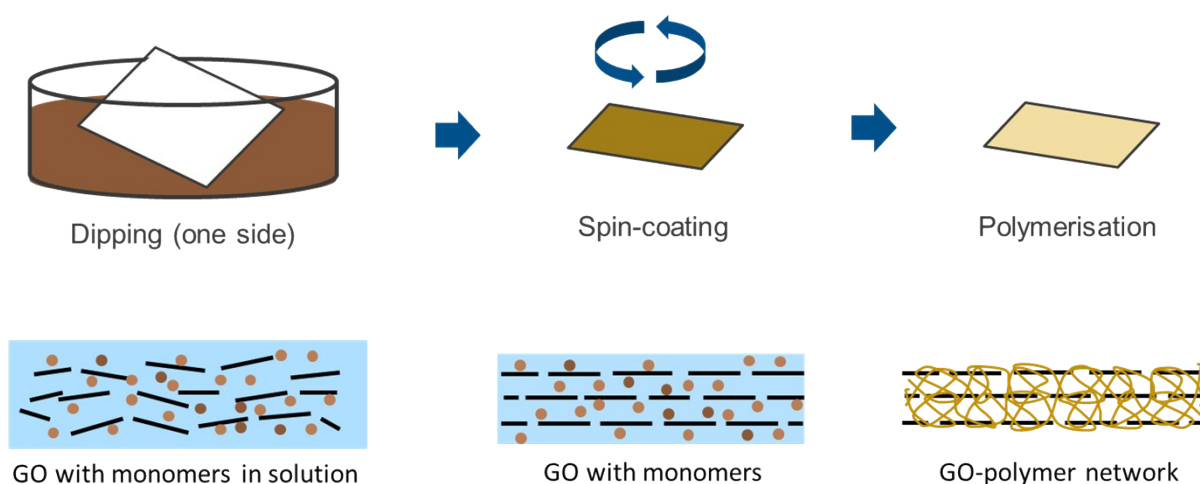

**Fig. S1** Schematic representation of fabrication of polymer network entwined GO thin-film composite membrane.

<sup>a</sup> Department of Chemical Engineering, Monash University, VIC 3800, Australia.

E-mail: [huanting.wang@monash.edu](mailto:huanting.wang@monash.edu)

<sup>b</sup> Department of Materials Science and Engineering, Monash University, VIC 3800, Australia.

<sup>c</sup> CSIRO Manufacturing, Bayview Ave, Clayton, VIC 3168, Australia.

† Footnotes relating to the title and/or authors should appear here.

Electronic Supplementary Information (ESI) available: [details of any supplementary information available should be included here]. See DOI: 10.1039/x0xx00000x

## ARTICLE

**Table S1** Detailed quantities of components in the precursor solution for spin-coating

| Samples | Monomers (mg) |     |     | Water (ml) | GO (mg) | GO conc. (mg/ml) | GO/polymer ratio (wt%) |
|---------|---------------|-----|-----|------------|---------|------------------|------------------------|
|         | NIPAM         | MBA | APS |            |         |                  |                        |
| GO-P61  |               |     |     |            | 3.4     | 0.34             | 4.5                    |
| GO-P65  |               |     |     |            | 4.8     | 0.48             | 6.3                    |
| GO-P72  | 38            | 38  | 7   | 10         | 9.5     | 0.95             | 12.5                   |
| GO-P79  |               |     |     |            | 19      | 1.9              | 25.0                   |
| GO-P87  |               |     |     |            | 28.5    | 2.85             | 37.5                   |
| GO-P95  |               |     |     |            | 38      | 3.8              | 50.0                   |

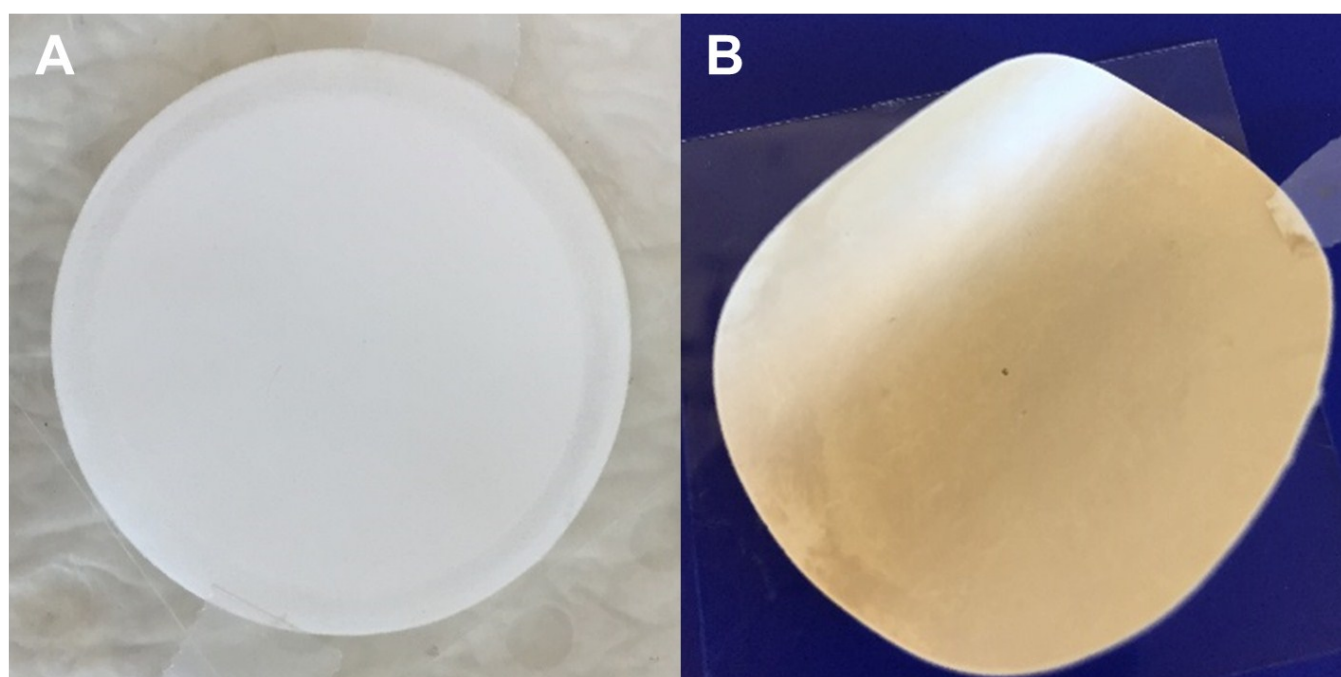**Fig. S2** Photos of (A) a Nylon substrate, and (B) a GO-polymer composite membrane (GO-P61).

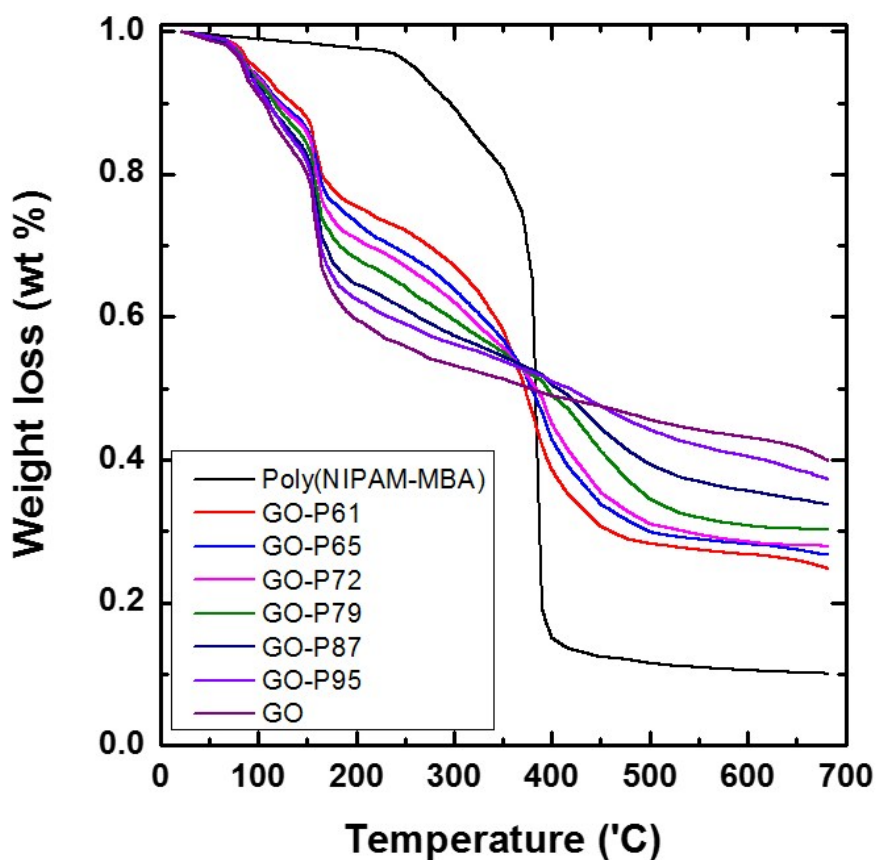

**Fig. S3** Thermogravimetric analysis (TGA) curves of GO-polymer composites with different GO/polymer ratios.

Poly(*N*-isopropylacrylamide-*co-N,N'*-methylene-bis-acrylamide) are thermally stable until around 250 °C and dramatically decomposed after 350 °C. Otherwise, there is a serious weigh loss between 100 °C and 200 °C on GO from a decomposition of hydroxyl groups on GO. GO-polymer ratio was confirmed by comparison of weight change between 100 °C and 250 °C.

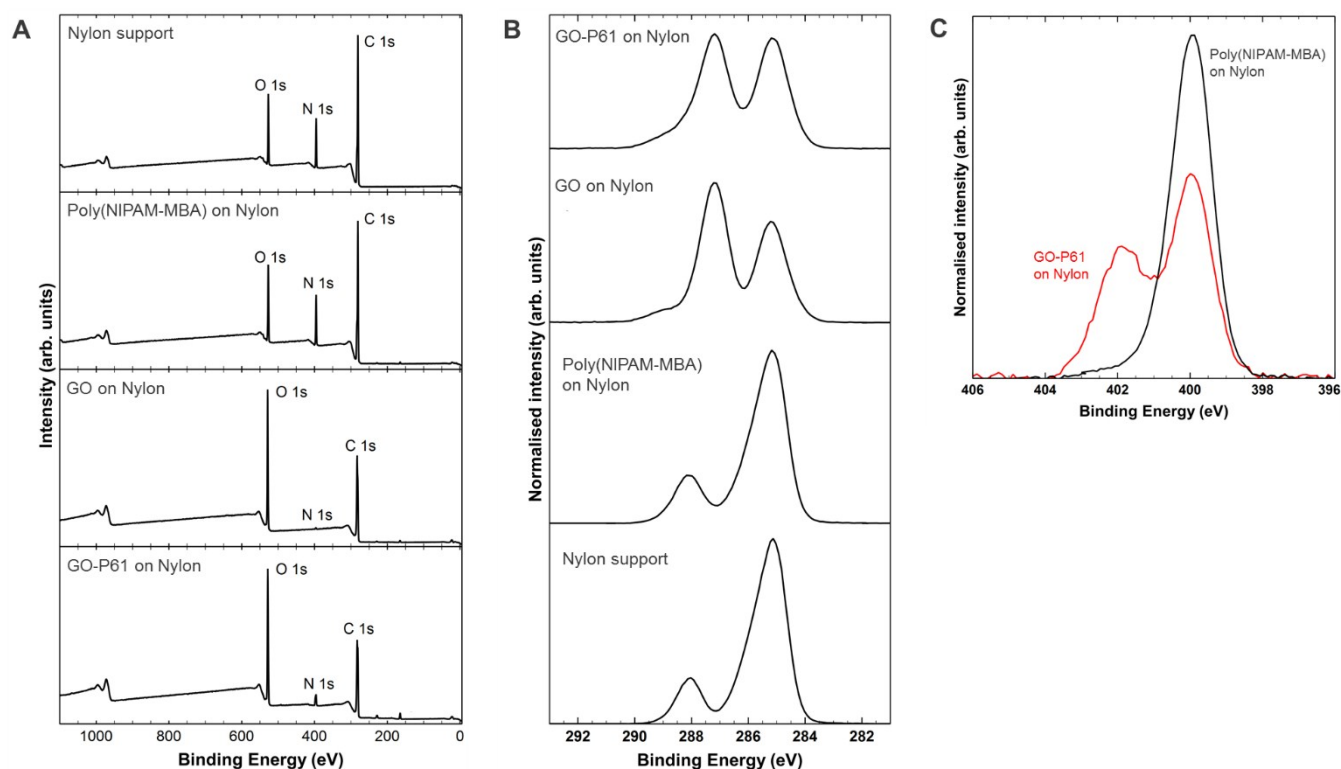

**Fig. S4** X-ray photoelectron spectroscopy (XPS) spectra (a) survey spectrum series, (b) selected, representative C 1s spectra of untreated and modified Nylon support samples, and (c) selected, representative N 1s spectra overlay of polymer coated Nylon filter with (GO-P61) and without GO (poly(NIPAM-MBA)).

XPS analysis confirms GO on Nylon as the N signal is suppressed significantly and N/O ratio has dropped as compared with raw Nylon support.<sup>1</sup> In the C 1s spectra (**Fig. S4B**), spectra are normalised to total peak area and charge corrected using a binding energy reference value of 285 eV for aliphatic hydrocarbon. Intensity in the region 288 eV is associated with amides, as expected for the Nylon support and poly(NIPAM-MBA) coated Nylon support samples, where the peak shape is characteristic of a polyamide. The introduction of intensity in the region of 287 eV for the GO treated samples is associated with C-O.<sup>2</sup> For the N 1s spectra (**Fig. S4C**), the addition of GO to the poly(NIPAM-MBA) results in intensity in the region 402 eV, which is associated with N<sup>+</sup> groups; this suggests there is a charge interaction between the PNIPAM and GO.<sup>3</sup>

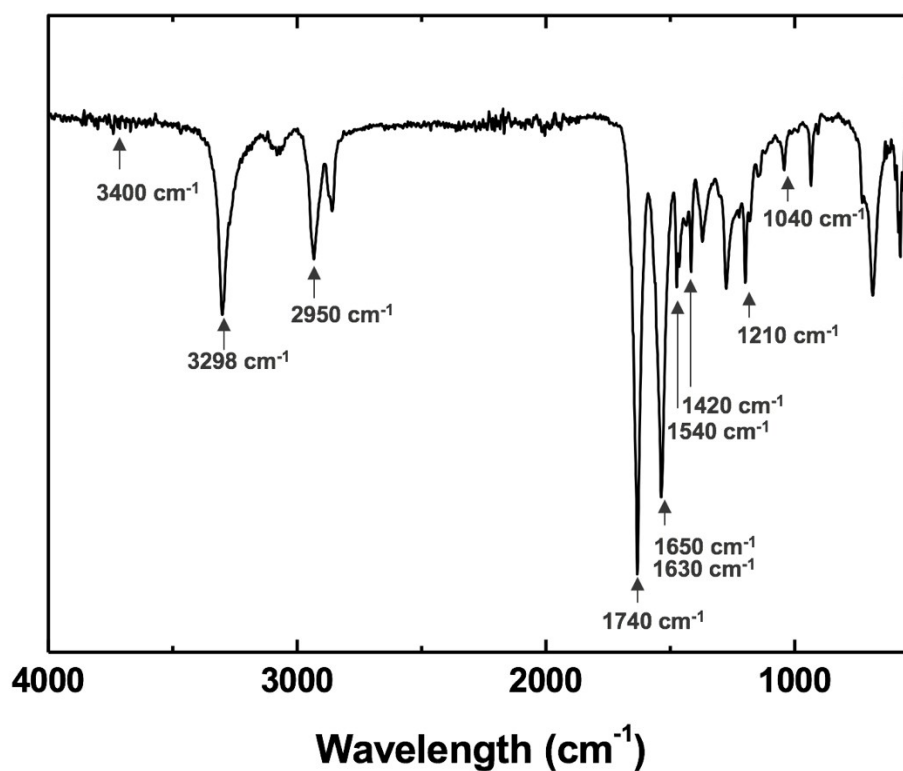

**Fig. S5** Attenuated total reflection-Fourier transform infrared (ATR-FTIR) spectrum of a GO-polymer thin-film composite membrane (GO-P61).

ATR-FTIR spectrum of a GO-polymer shows combined characteristics of GO and poly(NIPAM-MBA). The main peaks are as follows: 3298 cm<sup>-1</sup> (secondary amide N-H stretching), 2950 cm<sup>-1</sup> (-CH<sub>3</sub> asymmetric stretching), 1740 cm<sup>-1</sup> (secondary amide C=O stretching, 1650 cm<sup>-1</sup> (secondary amide C=O stretching, aka amide I bond), and 1540 cm<sup>-1</sup> (C-N stretching) for poly(NIPAM-MBA).<sup>4,5</sup> 3400 cm<sup>-1</sup> (O-H stretching), at 1630 cm<sup>-1</sup> (skeletal vibrations from unoxidized graphitic domains), 1420 cm<sup>-1</sup> (C=C aromatic ring) 1210 cm<sup>-1</sup> (C-O-C stretching), and 1040 cm<sup>-1</sup> (C-O stretching) for GO.<sup>5,6</sup> GO peaks are relatively weak as compared with poly(NIPAM-MBA) because of coverage of poly(NIPAM-MBA).

## ARTICLE

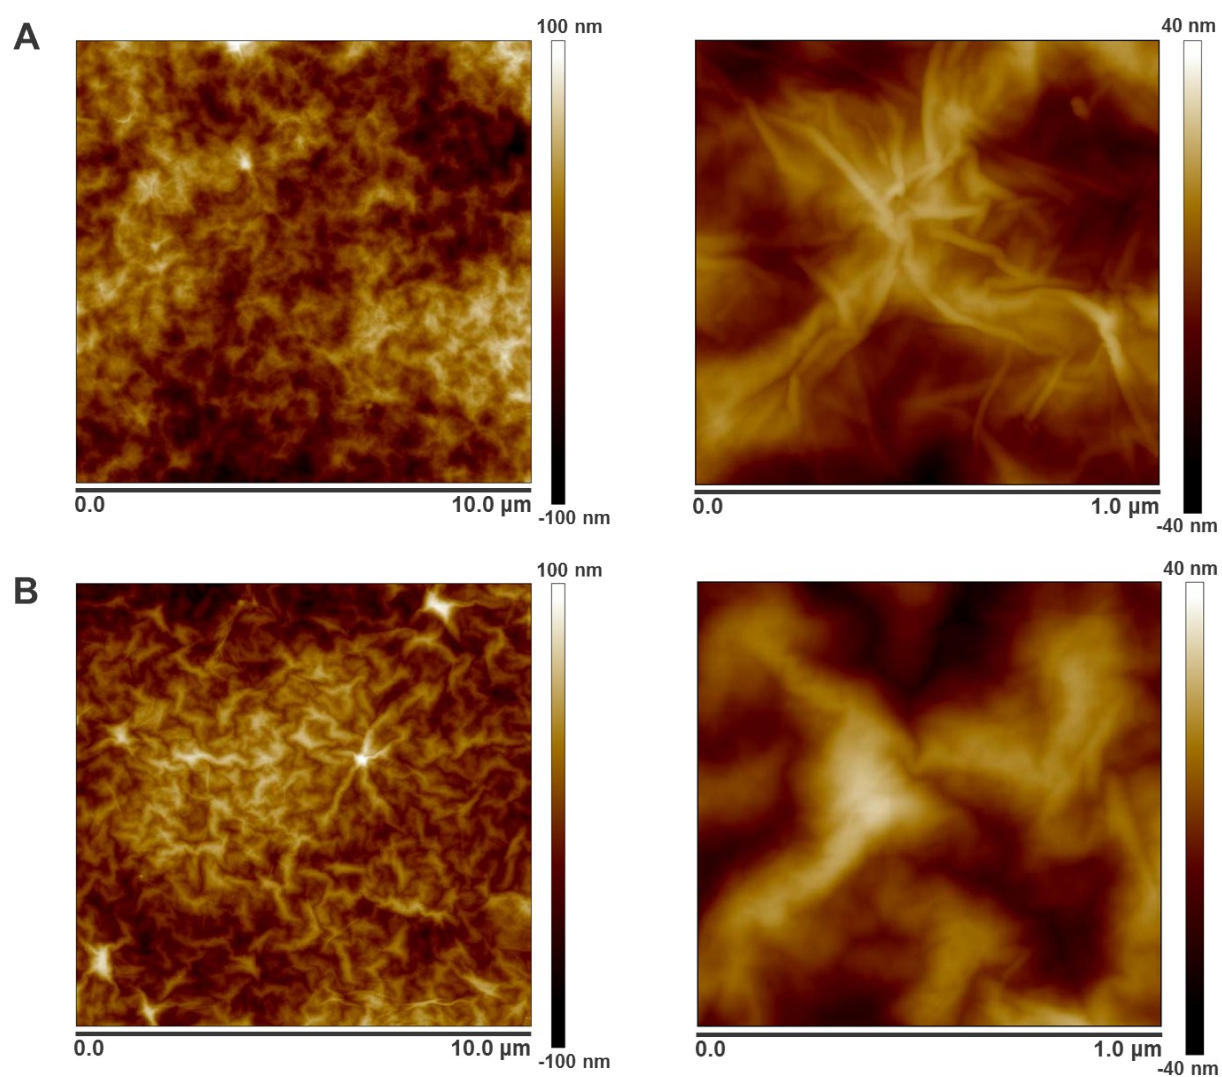

**Fig. S6** 2D AFM images of (A) a GO-polymer thin-film composite membrane (GO-P61), and (B) a layered GO membrane prepared by spin-coating.

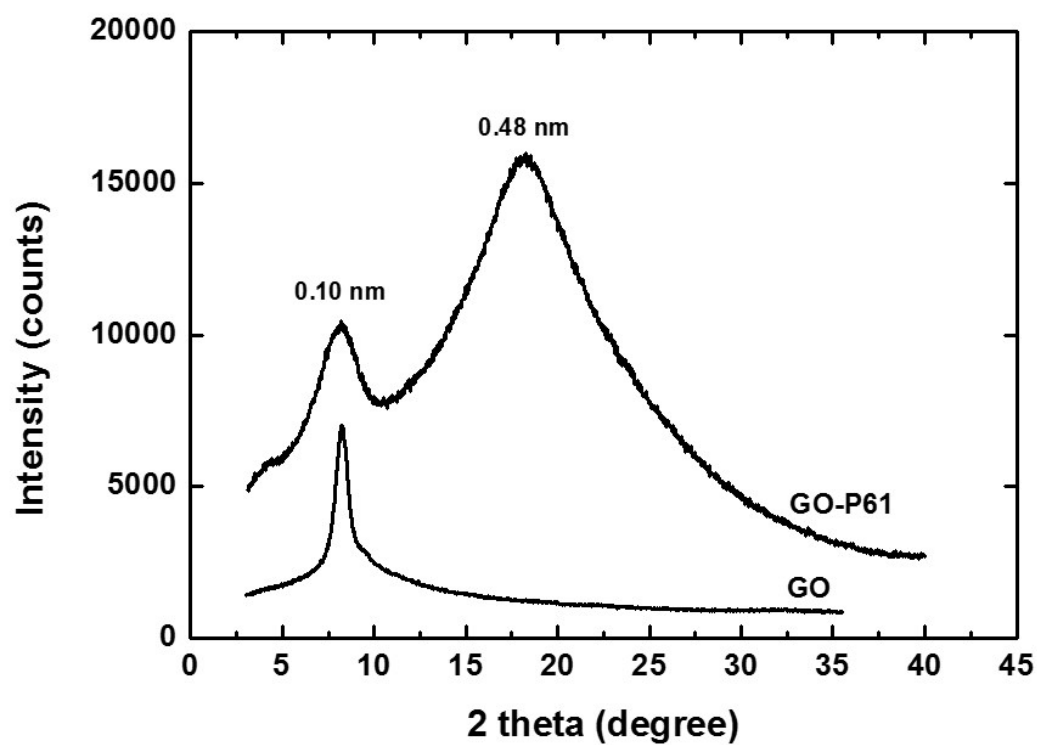

Fig. S7 XRD patterns of a GO and a GO-polymer thin-film composite membrane (GO-P61).

The d-spacing values for the peaks at  $8.5^\circ$  and  $18.0^\circ$  were calculated using Bragg's equation to be 1.04 nm and 0.48 nm, respectively. Because poly(NIPAM-MBA) is amorphous, the d-spacing values should correspond to the interlayer spacing of GO nanosheets. The weak peak at  $8.5^\circ$  is similar to that observed in the pure GO laminate.<sup>7</sup>

## ARTICLE

## \* FO performances characterization

The water flux ( $J_w$ , L m<sup>-2</sup> h<sup>-1</sup>) was calculated by:

$$J_w = \frac{\Delta w}{s t} \quad (1)$$

where  $\Delta w$  (L) is the volume change of the feed solution,  $s$  (m<sup>2</sup>) is the effective membrane area and  $t$  (h) is the filtration time.

The reverse salt flux ( $J_s$ , g m<sup>-2</sup>, h<sup>-1</sup>) was calculated by

$$J_s = \frac{C_t V_t - C_0 V_0}{s t} \quad (2)$$

where  $C_0$  (g/L) and  $V_0$  (L) are the initial solute concentration and the initial volume of the feed, respectively, while  $C_t$  (g/L) and  $V_t$  (L) are the solute concentration and the volume of the feed over a running time  $t$  (h). The solute concentration of the feed solution was determined from the conductivity of the solution.

The FO salt rejection (%) was calculated by

$$R = \left(1 - \frac{C_p}{C_f}\right) \times 100 = \left(1 - \frac{J_{s,p}/J_{w,p}}{C_f}\right) \times 100 \quad (3)$$

where  $C_p$  (g/L) and  $C_f$  (g/L) are the salt concentration at permeate and feed.



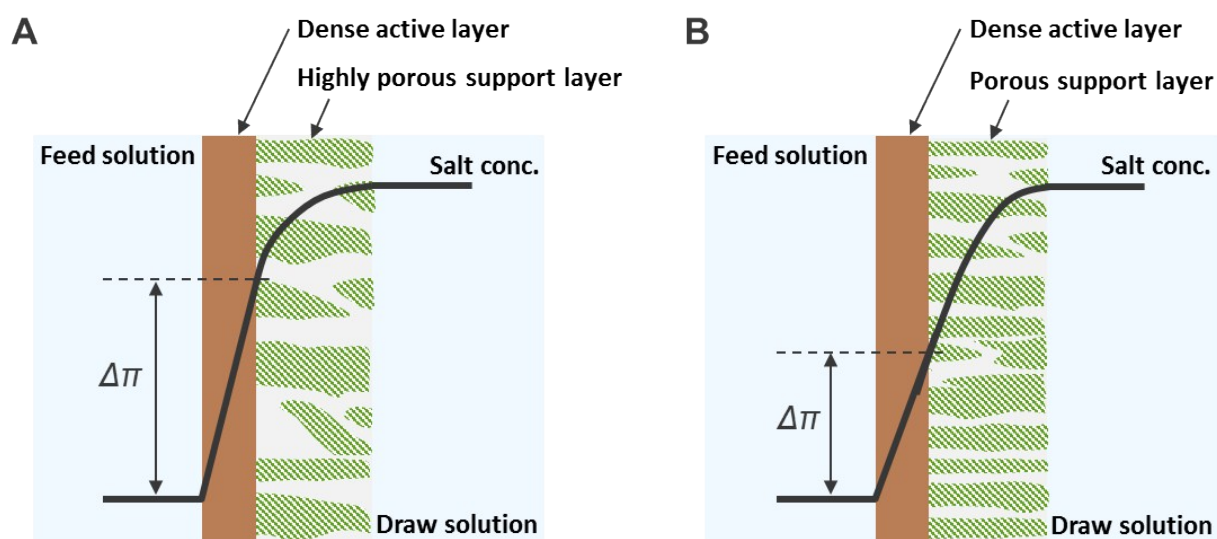

**Fig. S8** Osmotic pressure difference of FO composite membranes (A) when a highly porous support was used, and (B) when a less porous support was used.

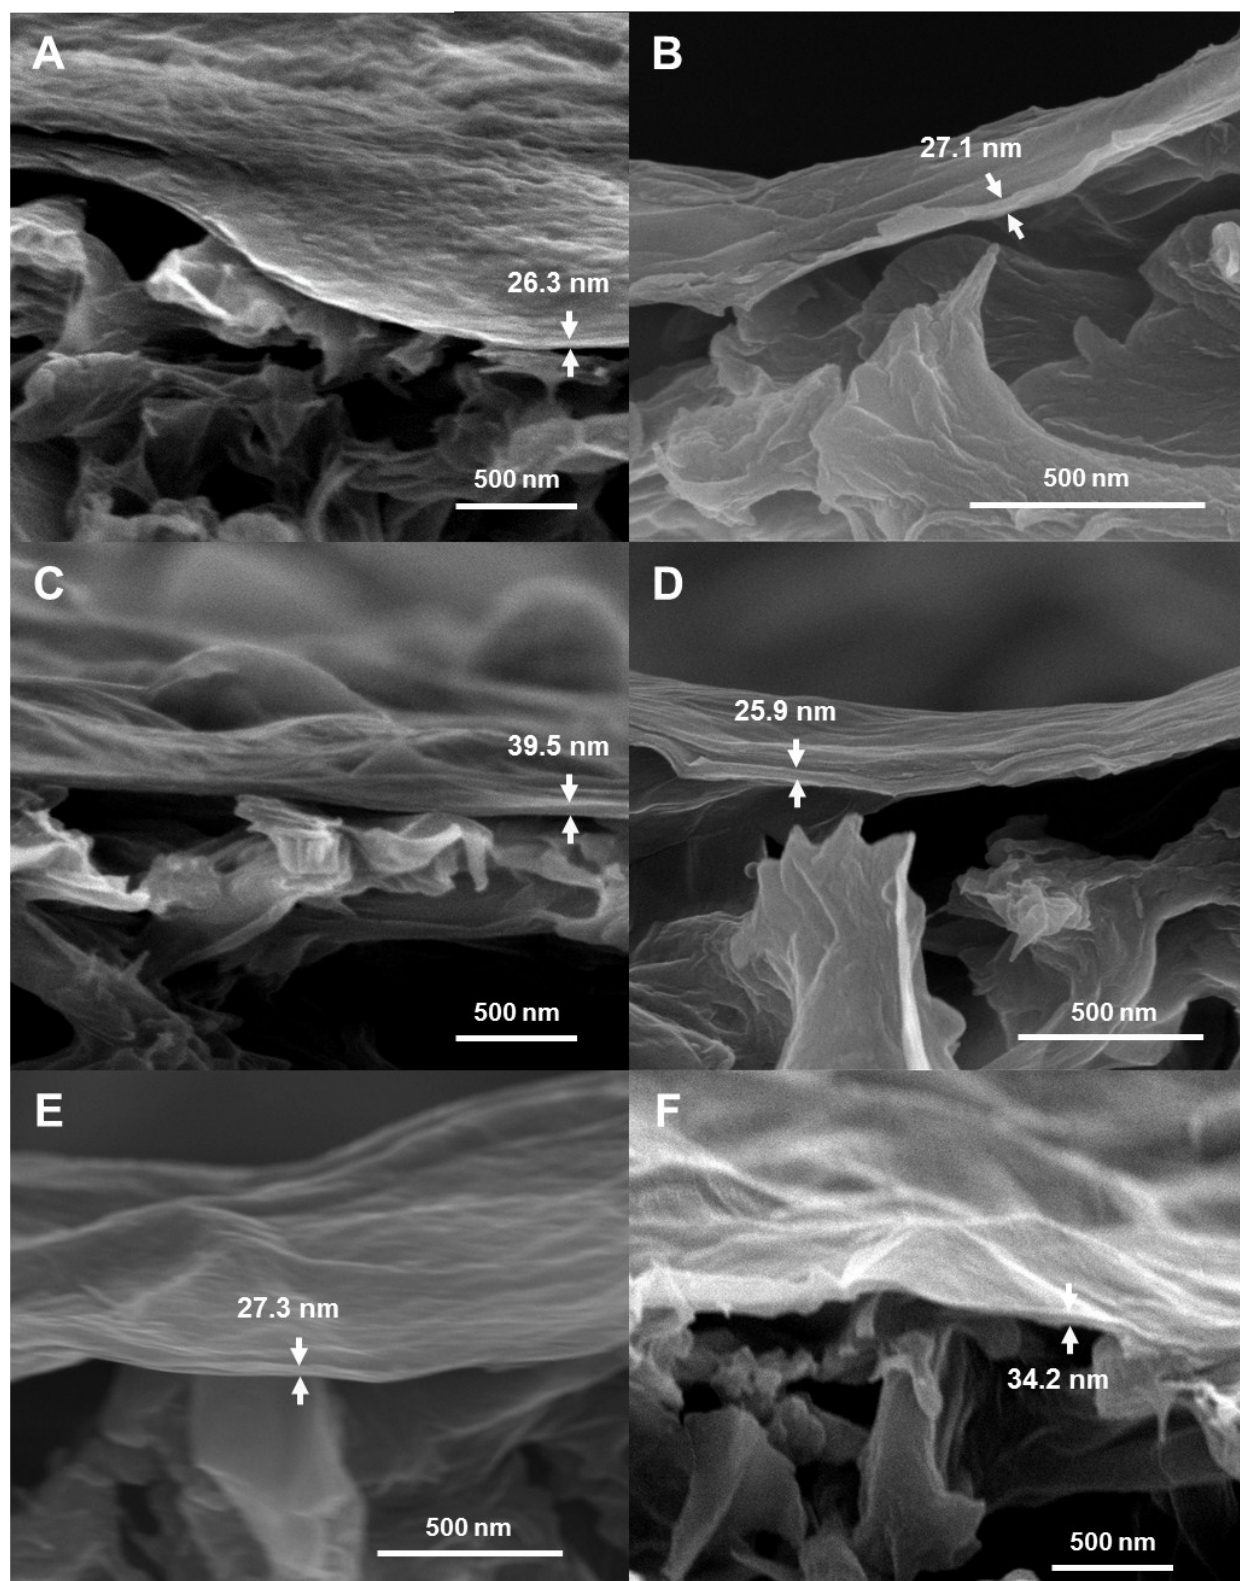

**Fig. S9** Cross-sectional SEM images of GO-polymer composite membranes (A) GO-P61, (B) GO-P65, (C) GO-P72, (D) GO-P79, (E) GO-P87, and (F) GO-P95.

## References

1. G. Beamson and D. Briggs, *Molecular Physics*, 1992, **76**, 919-936.
2. D. E. Lobo, P. C. Banerjee, C. D. Easton and M. Majumder, *Adv. Energy Mater.*, 2015, **5**.
3. C. D. Easton, A. J. Bullock, G. Gigliobianco, S. L. McArthur and S. MacNeil, *J. Mater. Chem. B*, 2014, **2**, 5558-5568.
4. Y. Cui, C. Tao, Y. Tian, Q. He and J. Li, *Langmuir*, 2006, **22**, 8205-8208.
5. T. A. Saleh and V. K. Gupta, *Separation and Purification Technology*, 2012, **89**, 245-251.
6. Y. Xu, H. Bai, G. Lu, C. Li and G. Shi, *J. Am. Chem. Soc.*, 2008, **130**, 5856-5857.
7. D. C. Marcano, D. V. Kosynkin, J. M. Berlin, A. Sinitskii, Z. Sun, A. Slesarev, L. B. Alemany, W. Lu and J. M. Tour, *ACS Nano*, 2010, **4**, 4806-4814.
